# Supplementary material for: 4,2-Ribbon like ferromagnetic cyano-bridged FeIII2NiII chains: a magneto-structural study
Source: Royal Society of Chemistry journal article supplement (doi:10.1039/b705084b), 2007-01-01
Supplement: b705084b.pdf [file b705084b.pdf]

## Supporting Information

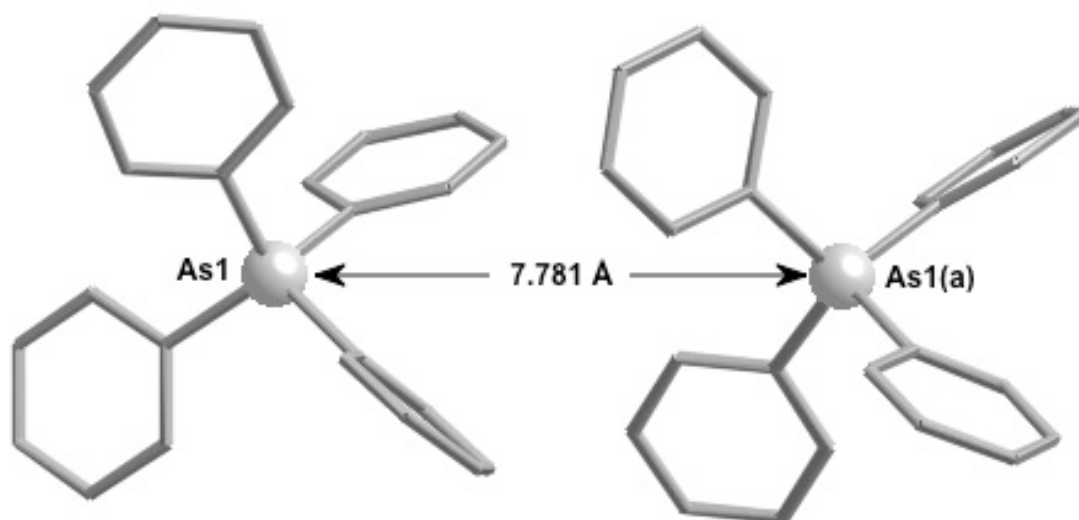

**Figure S1.** A representation of the translational quadruple phenyl embrace TQPE in **1**.

Symmetry code: (a) =  $1 - x, 1/2 + y, 1/2 - z$ .

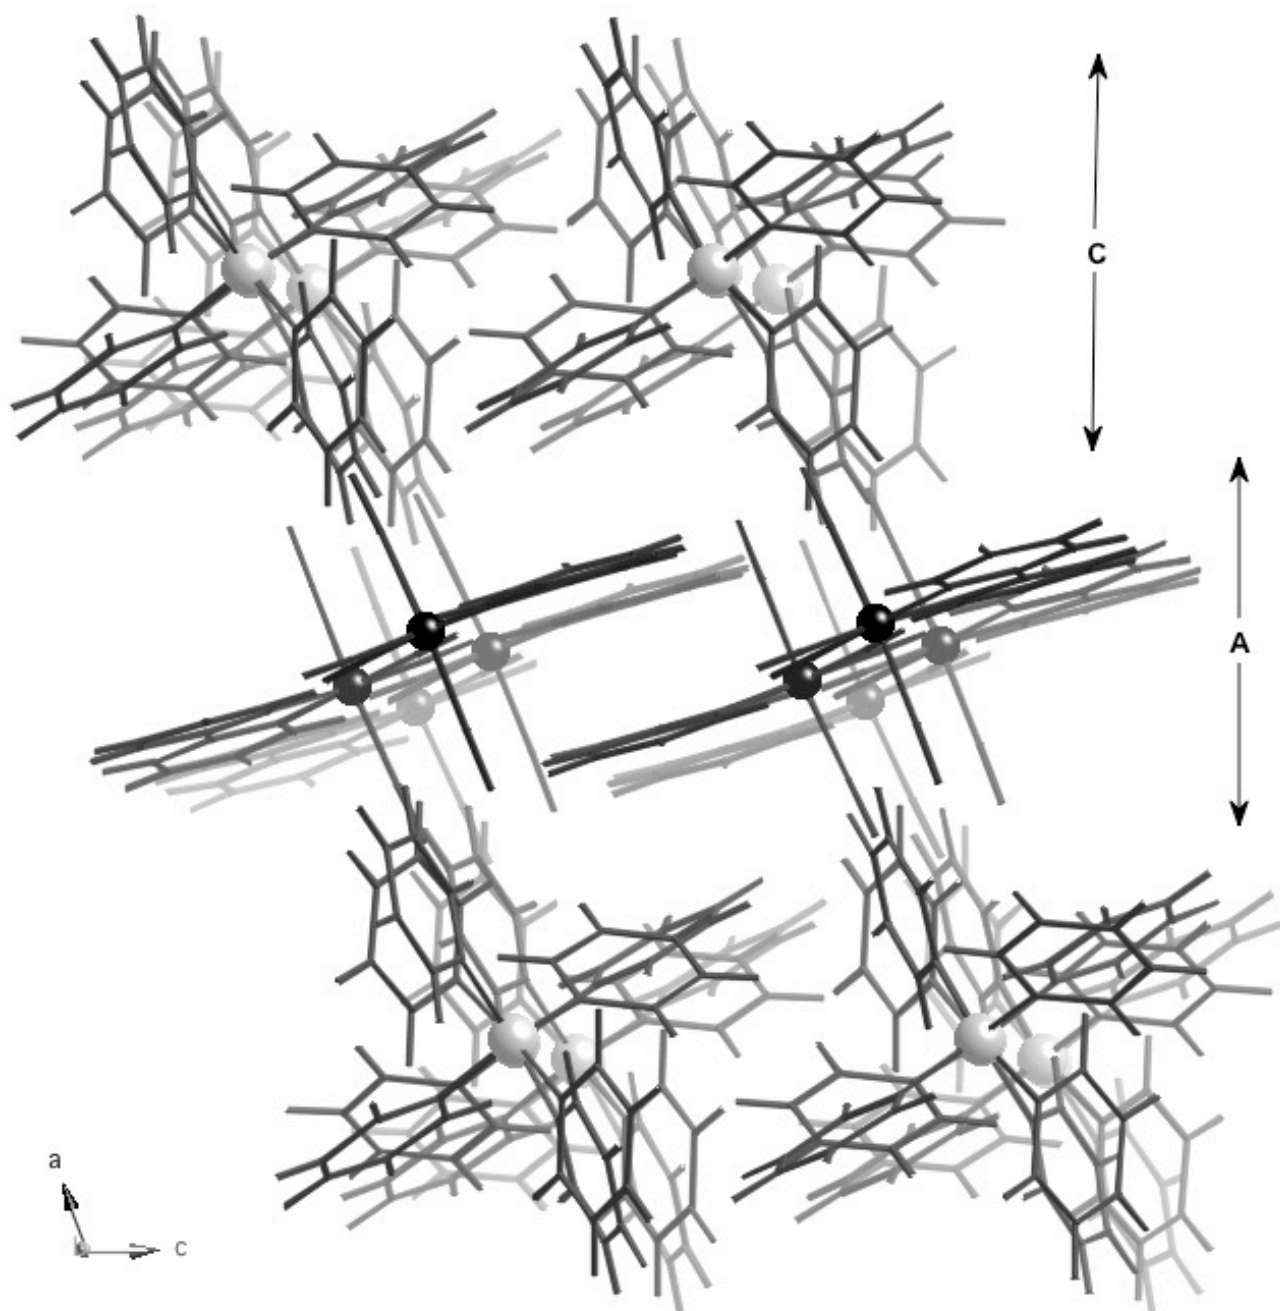

**Figure S2.** View along the crystallographic *b* axis of the crystal packing of **1** showing the alternating arrangement of the cations (C) and anions (A).

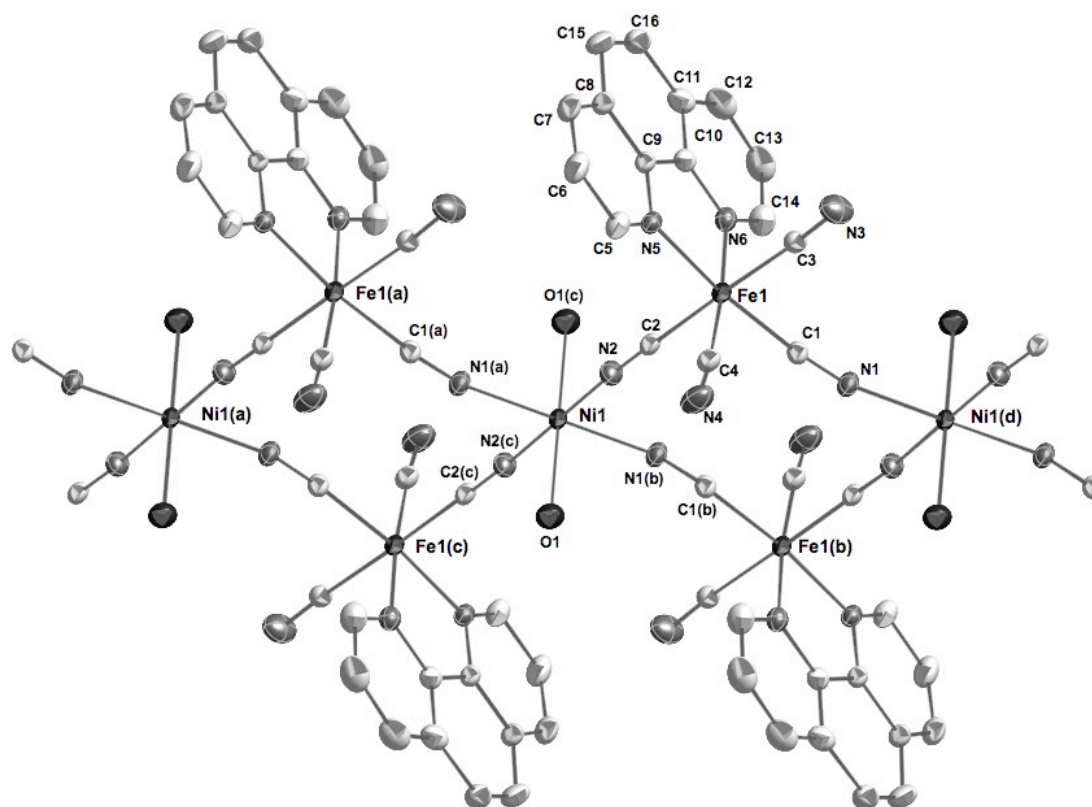

**Figure S3.** Perspective drawing along the crystallographic *a* axis of a fragment of the double zigzag chain of **3**. The thermal ellipsoids are drawn at the 50% probability level and the hydrogen atoms are omitted for clarity. Symmetry code: (a) =  $x - 1, y, z$ ; (b) =  $-x + 1, -y, -z + 1$ ; (c) =  $-x, -y, -z + 1$ ; (d) =  $x + 1, y, z$ .

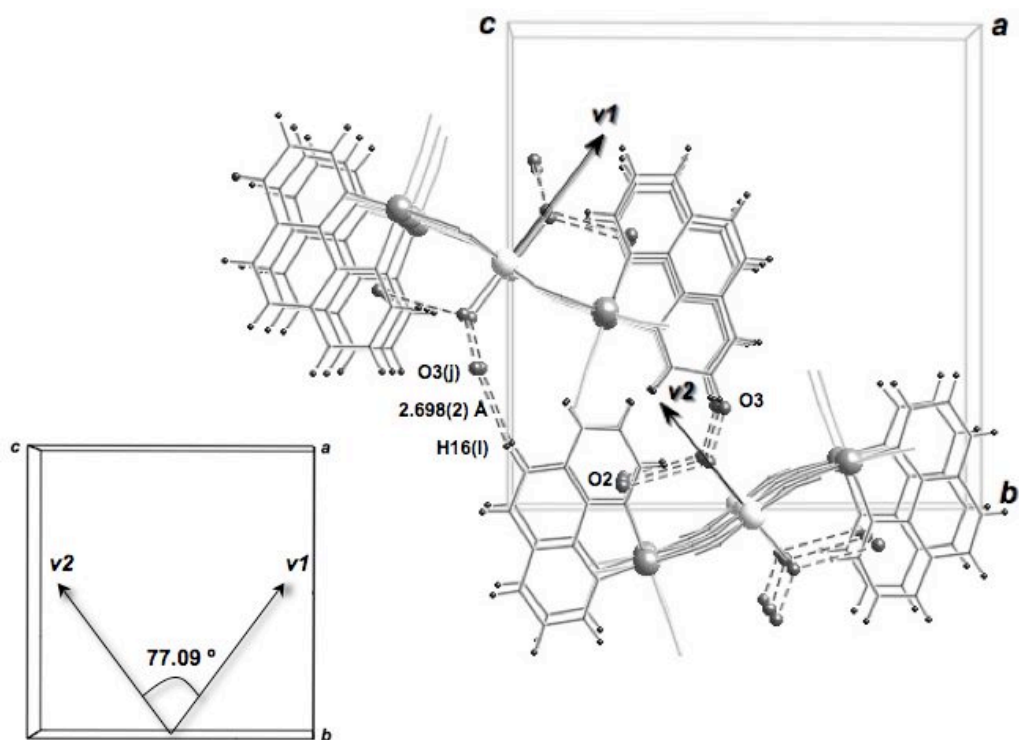

**Figure S4.** Perspective view in the plane  $bc$  of two neighboring chains of **3** showing the orientation of the vectors ( $v1$  and  $v2$ ) of the ribbon-like structure. Hydrogen bonds are drawn as broken lines. Symmetry code: (j) =  $x-1/2, -y+1/2, z-1/2$ ; (l) =  $-x, -y, -z+1$ .

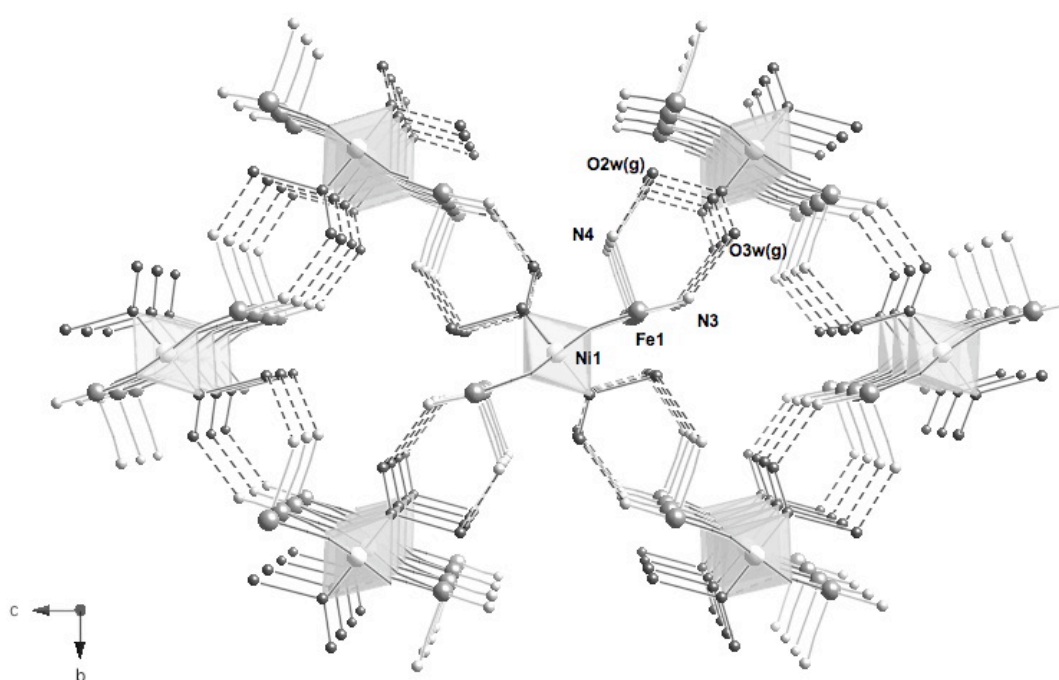

**Figure S5.** Schematic representation of the 3D structure formed *via* hydrogen bonds (broken lines) between the bimetallic chains of **3**. The phen ligands and the hydrogen atoms were omitted for the sake of clarity. Symmetry code: (g) =  $x - 1/2, y + 1/2, z - 1/2$ .

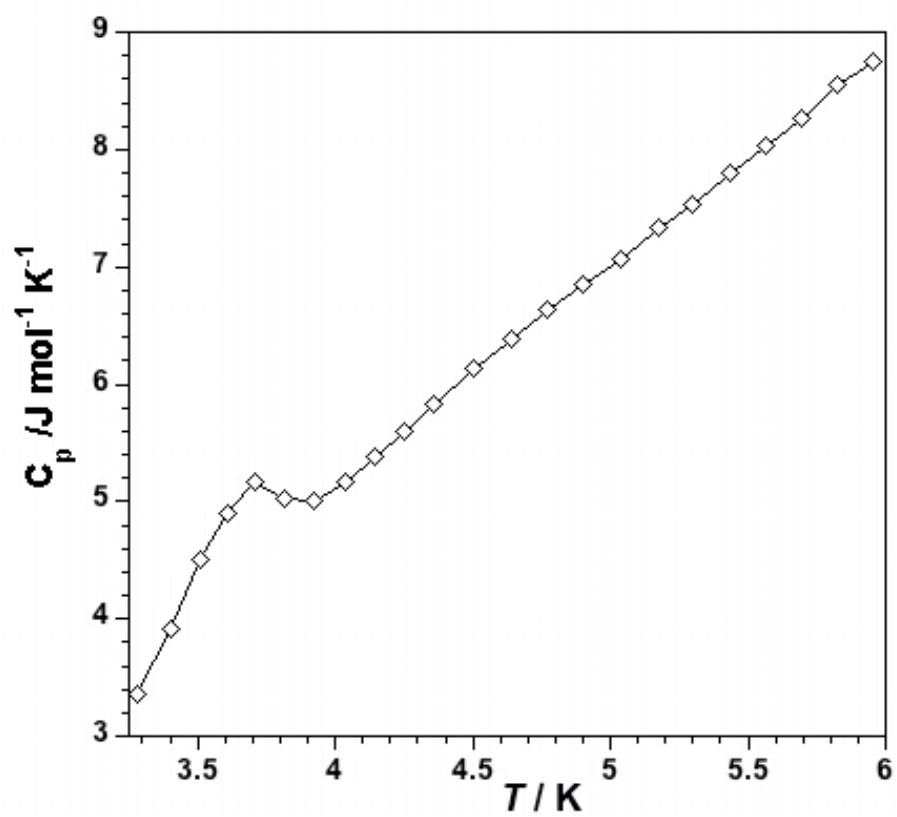

**Figure S6.** Heat capacity measurements on a pellet of **3** at very low temperatures.
